# Supplementary material
Source: Springer Nature journal article supplement (https://www.springermedizin.de/resource/supplementary/12875_2013_919_MOESM5_ESM.pdf/9435396)
Supplement: MOESM5 [file 9435396]

**Table 4: Number of Cough-related Diagnoses, Antibiotic Prescribing, and Diagnostic Uncertainty**

| <b>Number of Cough-Related Diagnoses</b> | <b>Visits</b>    | <b>Antibiotics Prescribed</b> | <b>Diagnostic Uncertainty</b> |
|------------------------------------------|------------------|-------------------------------|-------------------------------|
|                                          | <b>N (%)</b>     |                               |                               |
| 1 diagnosis                              | 519 (54)         | 82 (16)                       | 24 (5)                        |
| 2 diagnoses                              | 338 (35)         | 84 (25)                       | 85 (25)                       |
| 3+ diagnoses                             | 105 (11)         | 43 (41)                       | 42 (40)                       |
| <b>Total</b>                             | <b>962 (100)</b> | <b>209 (22)</b>               | <b>151 (16)</b>               |
